# Supplementary material for: Ratio of Intensities of Blue and Red Light at Cultivation Influences Photosynthetic Light Reactions, Respiration, Growth, and Reflectance Indices in Lettuce
Source: MDPI journal article supplement (doi:10.3390/biology11010060), 2022-01-01
Supplement: s1 [file s1]

**Table S1.** List of reflectance indices automatically calculated by the software of PolyPen RP 410 UVIS in accordance with [54] and used in the work.

| Index                                                  | Abbreviation | Equation                                                                                                                                                                                                                   | Reference |
|--------------------------------------------------------|--------------|----------------------------------------------------------------------------------------------------------------------------------------------------------------------------------------------------------------------------|-----------|
| Normalized Difference Vegetation Index                 | NDVI         | $NDVI = \frac{R_{NIR} - R_{RED}}{R_{NIR} + R_{RED}}$ <p>where <math>R_{NIR}</math> and <math>R_{RED}</math> are reflectance at near infrared (NIR) and red spectral regions.</p>                                           | [55]      |
| Simple Ratio Index                                     | SR           | $SR = \frac{R_{NIR}}{R_{RED}}$ <p>where <math>R_{NIR}</math> and <math>R_{RED}</math> are reflectance at near infrared (NIR) and red spectral regions.</p>                                                                 | [55]      |
| Optimized Soil-Adjusted Vegetation Index               | OSAVI        | $OSAVI = \frac{(1 + L)(R_{790} - R_{670})}{R_{790} + R_{670} + L}$ <p>where <math>R_{790}</math> and <math>R_{670}</math> are reflectance at 790 and 670 nm, <math>L = 0.16</math> is correction coefficient.</p>          | [56]      |
| Simple Ratio 554/677 Greenness Index                   | G            | $G = \frac{R_{554}}{R_{677}}$ <p>where <math>R_{677}</math> and <math>R_{554}</math> are reflectance at 677 and 554 nm.</p>                                                                                                | [57]      |
| Modified Chlorophyll Absorption in Reflectance Index   | MCARI        | $MCARI = [(R_{700} - R_{670}) - 0.2(R_{700} - R_{550})] \frac{R_{700}}{R_{670}}$ <p>where <math>R_{700}</math>, <math>R_{670}</math>, and <math>R_{550}</math> are reflectance at 700, 670, and 550 nm.</p>                | [57,58]   |
| Modified Chlorophyll Absorption in Reflectance Index 1 | MCARI1       | $MCARI1 = 1.2[2.5(R_{790} - R_{670}) - 1.3(R_{790} - R_{550})]$ <p>where <math>R_{790}</math>, <math>R_{670}</math>, and <math>R_{550}</math> are reflectance at 790, 670, and 550 nm.</p>                                 | [57,58]   |
| Transformed Chlorophyll Absorption Ratio Index         | TCARI        | $TCARI = 3 \left[ (R_{700} - R_{670}) - 0.2(R_{700} - R_{550}) \frac{R_{700}}{R_{670}} \right]$ <p>where <math>R_{700}</math>, <math>R_{670}</math>, and <math>R_{550}</math> are reflectance at 700, 670, and 550 nm.</p> | [58]      |
| Triangular Vegetation Index                            | TVI          | $TVI = 0.5[120(R_{750} - R_{550}) - 200(R_{670} - R_{550})]$ <p>where <math>R_{750}</math>, <math>R_{670}</math>, and <math>R_{550}</math> are reflectance at 750, 670, and 550 nm.</p>                                    | [57,58]   |
| Zarco-Tejada and Miller Index                          | ZMI          | $ZMI = \frac{R_{750}}{R_{710}}$ <p>where <math>R_{750}</math> and <math>R_{710}</math> are reflectance at 750 and 710 nm.</p>                                                                                              | [57]      |
| Simple Ratio Pigment Index                             | SRPI         | $SRPI = \frac{R_{430}}{R_{680}}$ <p>where <math>R_{680}</math> and <math>R_{430}</math> are reflectance at 680 and 430 nm.</p>                                                                                             | [59]      |
| Normalized Phaeophytinization Index                    | NPQI         | $NPQI = \frac{R_{415} - R_{435}}{R_{415} + R_{435}}$ <p>where <math>R_{435}</math> and <math>R_{415}</math> are reflectance at 435 and 415 nm.</p>                                                                         | [57]      |
| Photochemical Reflectance Index                        | PRI          | $PRI = \frac{R_{531} - R_{570}}{R_{531} + R_{570}}$                                                                                                                                                                        | [60-62]   |

|                                      |      |                                                                                                                                                            |      |
|--------------------------------------|------|------------------------------------------------------------------------------------------------------------------------------------------------------------|------|
|                                      |      | where $R_{570}$ and $R_{531}$ are reflectance at 570 and 531 nm.                                                                                           |      |
| Normalized Pigment Chlorophyll Index | NPCI | $NPCI = \frac{R_{680} - R_{430}}{R_{680} + R_{430}}$ where $R_{680}$ and $R_{430}$ are reflectance at 680 and 430 nm.                                      | [63] |
| Carter Index 1                       | Ctr1 | $Ctr1 = \frac{R_{695}}{R_{420}}$ where $R_{695}$ and $R_{420}$ are reflectance at 695 and 420 nm.                                                          | [57] |
| Carter Index 2                       | Ctr2 | $Ctr2 = \frac{R_{695}}{R_{760}}$ where $R_{695}$ and $R_{760}$ are reflectance at 695 and 760 nm.                                                          | [57] |
| Lichtenthaler Index 1                | Lic1 | $Lic1 = \frac{R_{790} - R_{680}}{R_{790} + R_{680}}$ where $R_{790}$ and $R_{680}$ are reflectance at 790 and 680 nm.                                      | [57] |
| Lichtenthaler Index 2                | Lic2 | $Lic2 = \frac{R_{440}}{R_{690}}$ where $R_{690}$ and $R_{440}$ are reflectance at 690 and 440 nm.                                                          | [57] |
| Structure Intensive Pigment Index    | SIPI | $SIPI = \frac{R_{790} - R_{450}}{R_{790} + R_{650}}$ where $R_{790}$ , $R_{650}$ , and $R_{450}$ are reflectance at 790, 650, and 450 nm.                  | [64] |
| Gitelson and Merzlyak Index 1        | GM1  | $GM1 = \frac{R_{750}}{R_{550}}$ where $R_{750}$ and $R_{550}$ are reflectance at 750 and 550 nm.                                                           | [65] |
| Gitelson and Merzlyak Index 2        | GM2  | $GM2 = \frac{R_{750}}{R_{700}}$ where $R_{750}$ and $R_{700}$ are reflectance at 750 and 700 nm.                                                           | [65] |
| Anthocyanin Reflectance Index 1      | ARI1 | $ARI1 = \frac{1}{R_{550}} - \frac{1}{R_{700}}$ where $R_{700}$ and $R_{550}$ are reflectance at 700 and 550 nm.                                            | [66] |
| Anthocyanin Reflectance Index 2      | ARI2 | $ARI2 = R_{800} \left( \frac{1}{R_{550}} - \frac{1}{R_{700}} \right)$ where $R_{800}$ , $R_{700}$ , and $R_{550}$ are reflectance at 800, 700, and 550 nm. | [66] |
| Carotenoid Reflectance Index 1       | CRI1 | $CRI1 = \frac{1}{R_{510}} - \frac{1}{R_{550}}$ where $R_{550}$ and $R_{510}$ are reflectance at 550 and 510 nm.                                            | [67] |
| Carotenoid Reflectance Index 2       | CRI2 | $CRI2 = \frac{1}{R_{510}} - \frac{1}{R_{700}}$ where $R_{700}$ and $R_{510}$ are reflectance at 700 and 510 nm.                                            | [67] |
| Ratio Difference Vegetation Index    | RDVI | $RDVI = \frac{R_{800} - R_{670}}{(R_{800} + R_{670})^{1/2}}$ where $R_{800}$ and $R_{670}$ are reflectance at 800 and 670 nm.                              | [57] |
