# Supplementary material for: Ratio of Intensities of Blue and Red Light at Cultivation Influences Photosynthetic Light Reactions, Respiration, Growth, and Reflectance Indices in Lettuce
Source: MDPI journal article supplement (doi:10.3390/biology11010060), 2022-01-01
Supplement: s1 [file s1]

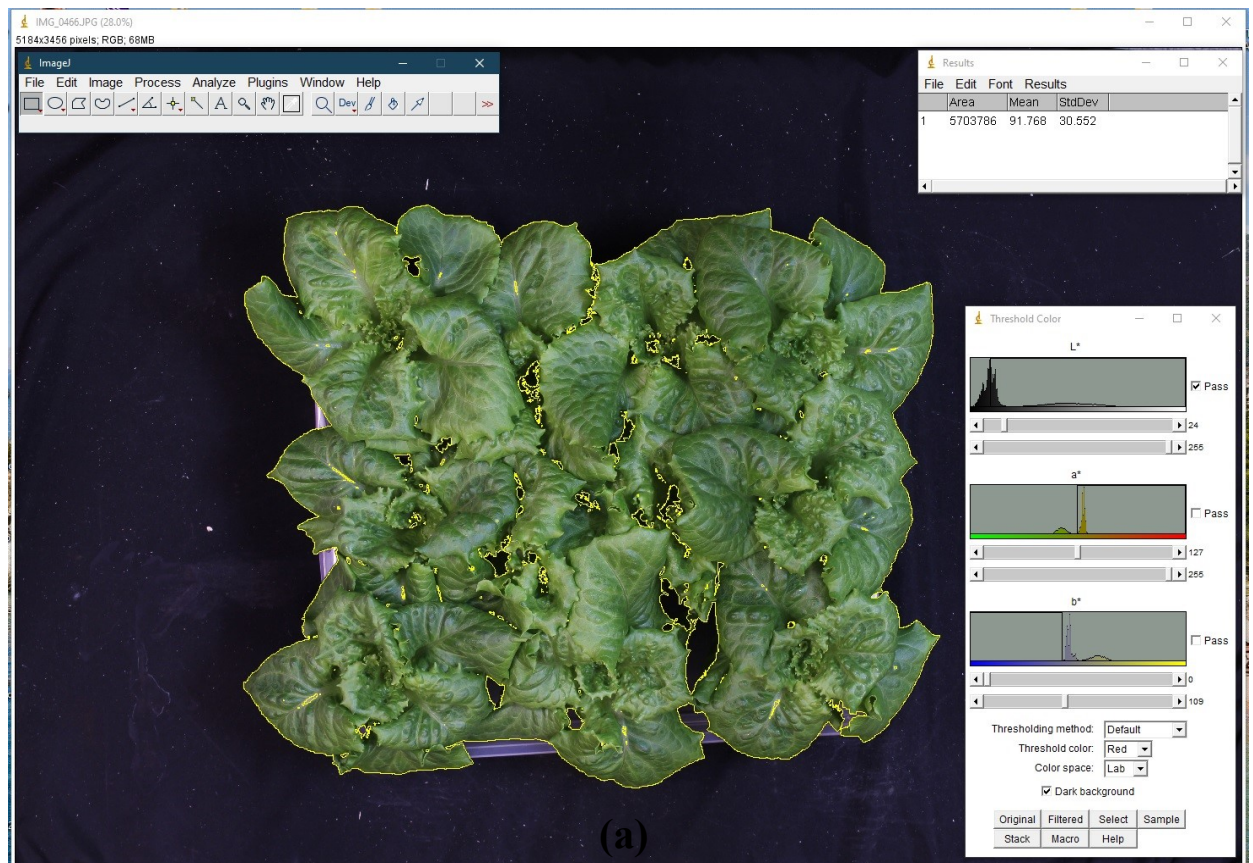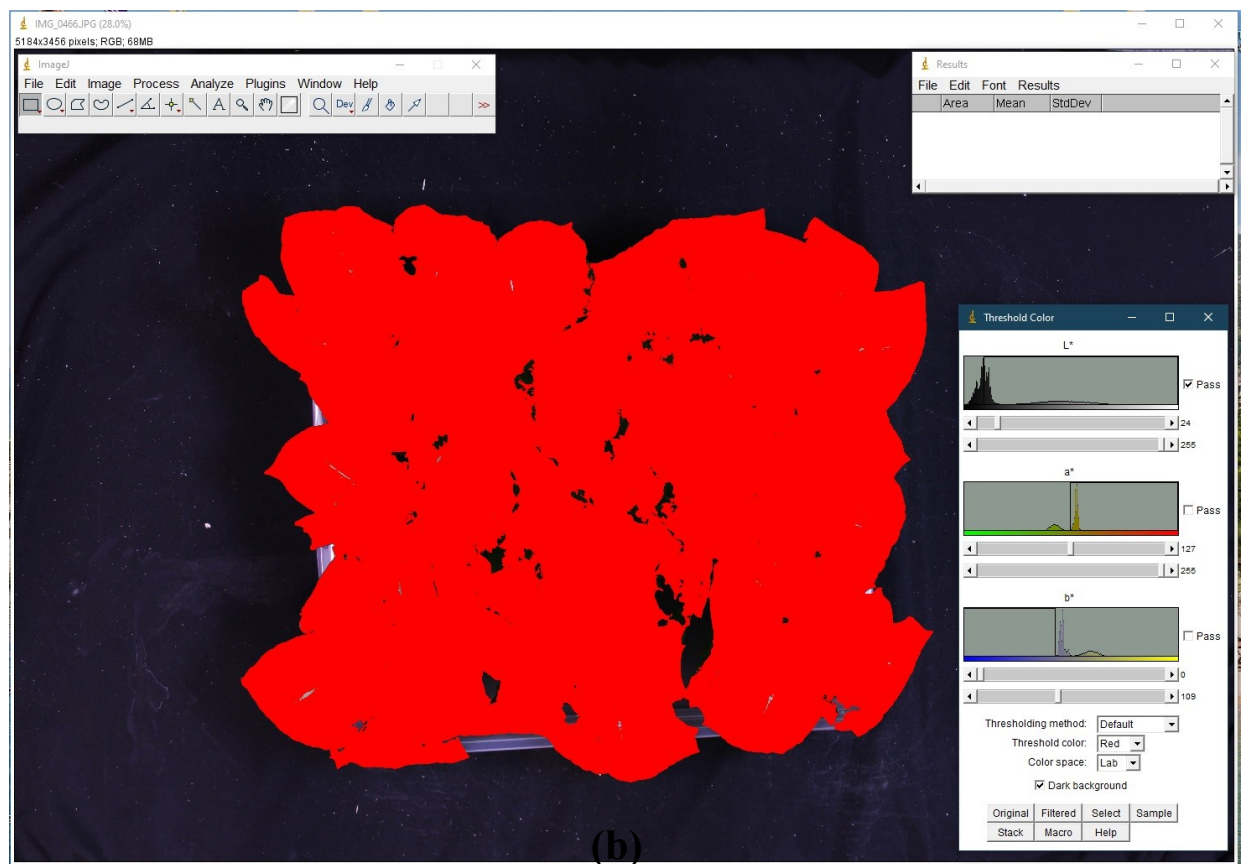

**Figure S1.** Example of estimation of green area of plants (for the red variant of illumination) with using ImageJ including the initial image (a) and image with marked green area (red color) (b).
